# Supplementary material for: C-X-C Motif Chemokine Ligand 9 and Its CXCR3 Receptor Are the Salt and Pepper for T Cells Trafficking in a Mouse Model of Gaucher Disease
Source: MDPI journal article supplement (doi:10.3390/ijms222312712), 2021-11-24
Supplement: s1 [file s1]

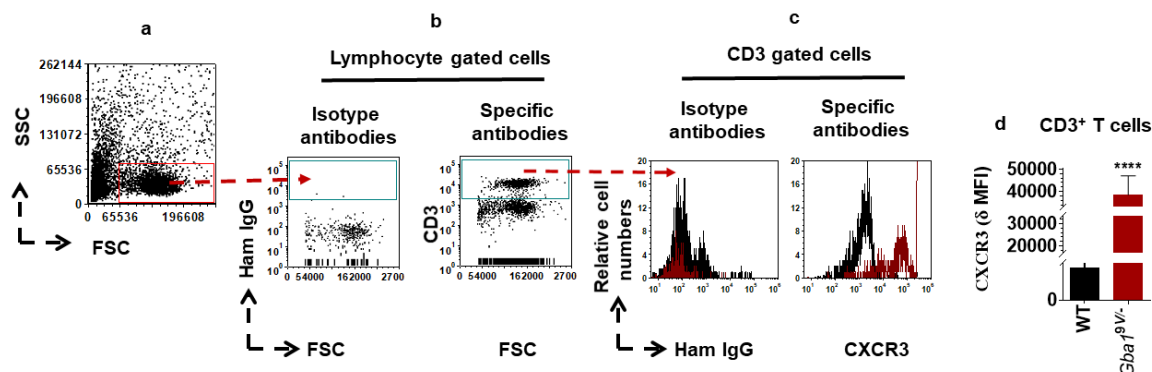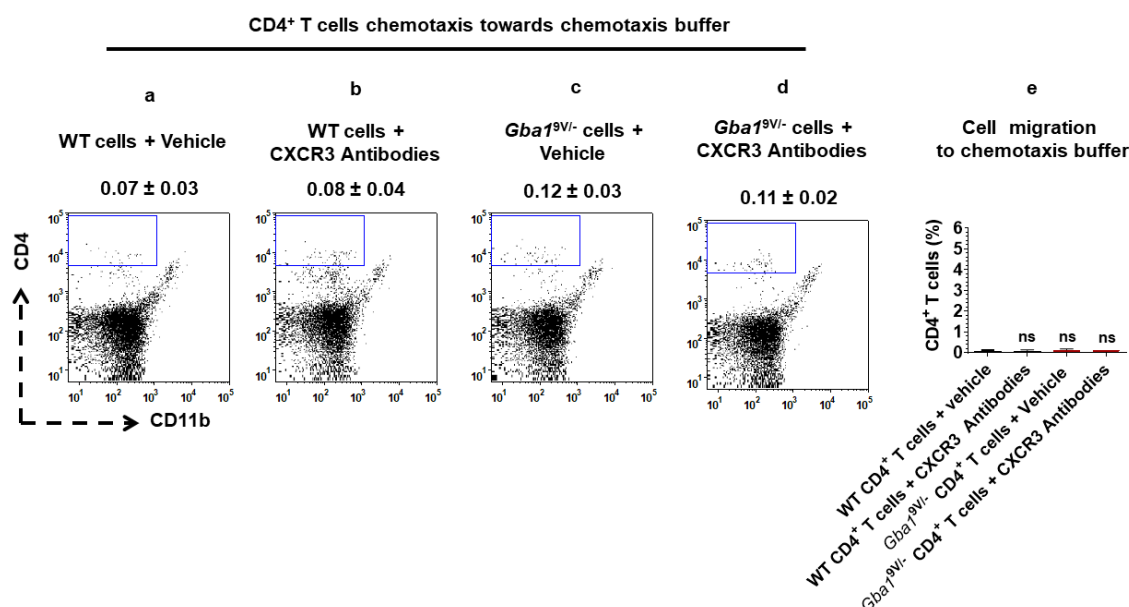

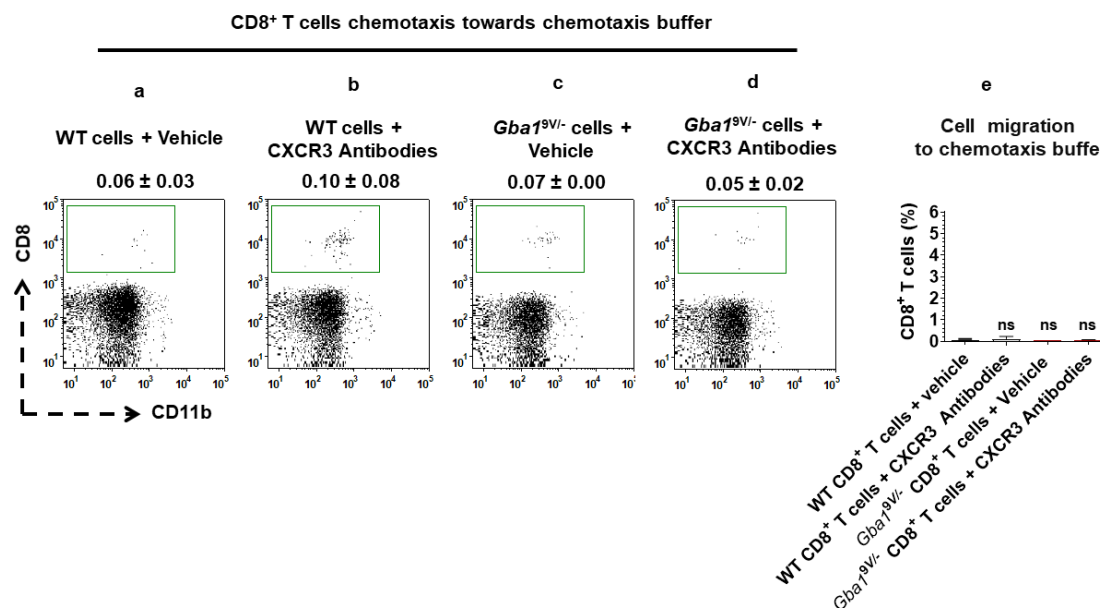

Supplementary. Figure S3 a - e. CXCR3 blocking and CD8<sup>+</sup> T cells chemotaxis towards 2% Gey's Balanced Salt Solution (GBSS; chemotaxis buffer). CD8<sup>+</sup> T cells purified spleens of WT and *Gba1*<sup>9V/-</sup> mice (n=5/group) were allowed to migrate towards 2% Gey's Balanced Salt Solution (GBSS; chemotaxis buffer) in the presence and absence of antibodies to mouse CXCR3 at 37°C and 5% CO<sub>2</sub> for 45 minutes as described in the method. Cells that had migrated through the filter and had attached to the lower side of the filter were collected and analyzed by FACS. Percentage of CD8<sup>+</sup>CD11b<sup>-</sup> T cells are shown from the (a) vehicle (PBS) treated WT cells and their migration to chemotaxis buffer, i.e., 2% Gey's Balanced Salt Solution (GBSS), (b) CXCR3 antibody treated WT cells and their migration to chemotaxis buffer, (c) PBS treated *Gba1*<sup>9V/-</sup> cells and their migration to chemotaxis buffer, and (d) CXCR3 antibody treated *Gba1*<sup>9V/-</sup> cells and their migration to chemotaxis buffer. (e) WT (black columns), *Gba1*<sup>9V/-</sup> (Maroon columns), and values shown in the bar diagram are the mean  $\pm$  s. d. and group comparison were performed with ANOVA. Three independent experiments were conducted (ns, not significant).

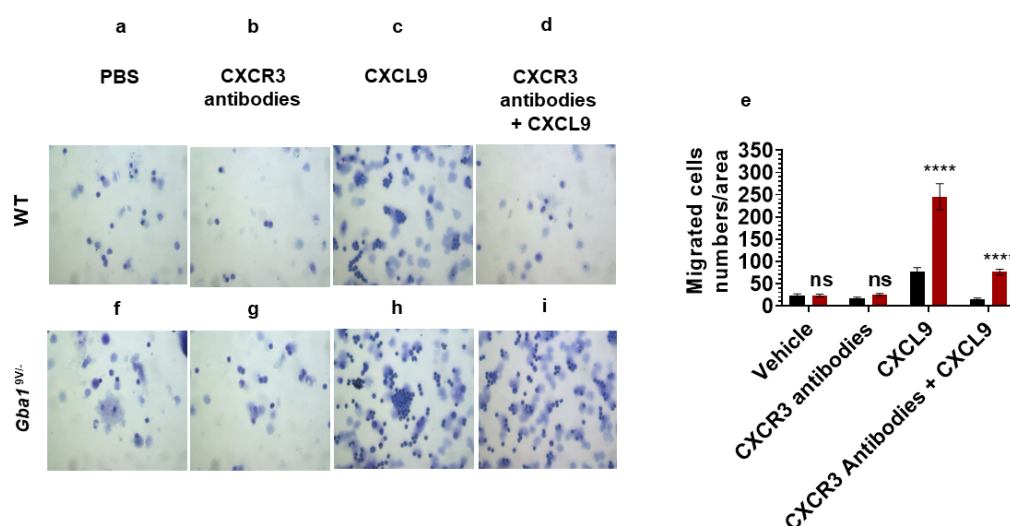

Supplementary. Figure S4 a - i. In vivo blocking of CXCR3 and microscopic evaluation of CXCL9-mediated peritoneal cell infiltrates in *Gba1*<sup>9V/-</sup> mice. WT and *Gba1*<sup>9V/-</sup> mice were injected with intraperitoneal administration of CXCL9 (c and h), antibodies to mouse CXCR3 (b and g), and its vehicle (a and f). In additional experiments, these mice were injected with intravenous injection of antibodies to mouse CXCR3 prior to intraperitoneal injection of CXCL9 (d and i). The peritoneal cells were stained with Diff-Quick staining and cells were counted under the light microscope. The corresponding bar diagrams shown on right represent the peritoneal cells migration to CXCL9 in the presence or absence of vehicle and antibodies to CXCR3 in WT and the *Gba1*<sup>9V/-</sup> mice (e). WT (black columns), *Gba1*<sup>9V/-</sup> (Maroon

---

columns), and the values shown are the mean  $\pm$  s. d. and group comparison were performed with ANOVA (ns, not significant; \*\*\*,  $p < 0.0001$ ).
